# Supplementary material for: MiR-155-5p Elevated by Ochratoxin A Induces Intestinal Fibrosis and Epithelial-to-Mesenchymal Transition through TGF-β Regulated Signaling Pathway In Vitro and In Vivo
Source: MDPI journal article supplement (doi:10.3390/toxins15070473), 2023-07-22
Supplement: s1 [file s1]

# Supplementary Materials: MiR-155-5p Elevated by Ochratoxin A Induces Intestinal Fibrosis and Epithelial-to-Mesenchymal Transition through TGF- $\beta$ Regulated Signaling Pathway In Vitro and In Vivo

Kyu Hyun Rhee, Seon Ah Yang, Min Cheol Pyo, Jae-Min Lim and Kwang-Won Lee \*

**Supplementary Table S1.** qRT-PCR primer sequences

| Origin | Marker        |         | Sequence (5'→3')                |
|--------|---------------|---------|---------------------------------|
| Human  | Fibronectin   | Forward | CTG GCC GAA AAT ACA TTG TAA A   |
|        |               | Reverse | CCA CAG TCG GGT CAG GAG         |
|        | $\alpha$ -SMA | Forward | CTC TCT GTC CAC CTT CCA G       |
|        |               | Reverse | TAA CGA GTC AGA GCT TTC GC      |
|        | E-cadherin    | Forward | GCC TCC TGA AAA GAG AGT GGA AG  |
|        |               | Reverse | TGG CAG TGT CTC TCC AAA TCC G   |
|        | TGF- $\beta$  | Forward | CAA CAA TTC CTG GCG ATA CC      |
|        |               | Reverse | GCT AAG GCG AAA GCC CTC AAT     |
|        | C/EBP $\beta$ | Forward | CTT CAG CCC GTA CCT GGA G       |
|        |               | Reverse | GGA GAG GAA GTC GTG GTG C       |
|        | GAPDH         | Forward | TGC ACC ACC AAC TGC TTA GC      |
|        |               | Reverse | GGC ATG GAC TGT GGT CAT GAG     |
| Mouse  | Fibronectin   | Forward | CAC GAT GCG GGT CAC TTG         |
|        |               | Reverse | CTG CAA CGT CCT CAT TCT TC      |
|        | $\alpha$ -SMA | Forward | TCC TGA CGC TGA ACT ATC CG      |
|        |               | Reverse | GGC CAC ACG AAG CTC CTT AT      |
|        | E-cadherin    | Forward | CCA AGC AGC AGT ACA TTC TAC A   |
|        |               | Reverse | CAT TCA CAT CCA GCA CAT CCA     |
|        | TGF- $\beta$  | Forward | CAC CGG AGA GCC CTG GAT A       |
|        |               | Reverse | TGT ACA GCT GCC GCA CAC A       |
|        | C/EBP $\beta$ | Forward | ATC GAC TTC AGC CCC TAC CT      |
|        |               | Reverse | TAG TCG TCG GCG AAG AGG         |
|        | GAPDH         | Forward | AGA ACA TCA TCA TCC CTG CAT CCA |
|        |               | Reverse | CCG TTC AGC TCT GGG ATC AC      |
